# Supplementary material
Source: Springer Nature journal article supplement (https://www.springermedizin.de/resource/supplementary/12985_2011_1492_MOESM4_ESM.pdf/9609978)
Supplement: MOESM4 [file 9609978]

**Table 2:** Evolution of antiretroviral resistance mutations in HIV-1 individuals with dual infections

| Case | Time points | Primary subtype                                                                                       |                                                                                                 | Secondary subtype        |      |
|------|-------------|-------------------------------------------------------------------------------------------------------|-------------------------------------------------------------------------------------------------|--------------------------|------|
|      |             | Prot                                                                                                  | RT                                                                                              | Prot                     | RT   |
| C1   | S1          | NONE                                                                                                  | M41L/ M184V/ Y188L/ L210W/<br>T215Y <sup>21</sup><br><i>V106I, H221Y and D67N<sup>(A)</sup></i> | NONE                     | NONE |
|      | S2          | L10I/ I15V/ M46I/ L63P/ I84V/<br>I85V/ L90M <sup>12</sup><br><i>M36I and F53L/ A71T<sup>(A)</sup></i> | M41L/ D67N/ L210W/ T215Y <sup>12</sup>                                                          | NON DETECTED             |      |
| C2   | CRF12_BF    |                                                                                                       | B subtype                                                                                       |                          |      |
|      | NONE        | NONE                                                                                                  | I84V/ L90M                                                                                      | M41L/ K70E/ L210W/ T215Y |      |
| C3   | B subtype   |                                                                                                       | CRF12_BF                                                                                        |                          |      |
|      | NONE        | K103N <sup>1</sup>                                                                                    | NONE                                                                                            | NONE                     |      |
| C4   | CRF12_BF    |                                                                                                       | B subtype                                                                                       |                          |      |
|      | S1          | I47V <sup>1</sup>                                                                                     | NONE                                                                                            | NONE                     | NONE |
| S2   | NONE        | K70R <sup>1</sup>                                                                                     | NON DETECTED                                                                                    |                          |      |
| C5   | CRF12_BF    |                                                                                                       | BF recombinant (not CRF12)                                                                      |                          |      |
|      | S1          | NONE                                                                                                  | Y181C/ H221Y <sup>2</sup>                                                                       | NON DETECTED             |      |
| S2   | NONE        | Y181C <sup>1</sup>                                                                                    | NONE                                                                                            | NONE                     |      |

A mean of sixteen sequences and/ or clones per sample were analyzed with Stanford software. Resistance mutations separated by bars indicate combination of mutations in the sequences. The number indicated by superscript shows the number of sequences or clones with the corresponding mutation or combination of mutations.

(A) Each mutation in different sequences and carrying the combination of mutations indicated.
